# Supplementary material
Source: PubMed Central journal article supplement (PMC4041589)
Supplement: NIHMS584877-supplement-Supporting_Information.pdf [file NIHMS584877-supplement-Supporting_Information.pdf]

## Supplementary Materials and Methods

### Chemicals and Reagents

All chemicals used were reagent grade or better.

### Plasmids

All plasmids used were previously constructed in our lab and are described in Maldonado [1]. pASK-Pup expresses Pup-GGQ from a tet promoter/operator, which is induced by using anhydrotetracycline. This plasmid confers ampicillin resistance, and contains an f1 origin and the *tet* gene, which encodes for Tet repressor. pRSF-*Msm* Mpa expresses *Mycobacterium smegmatis* (*Msm*) Mpa from a T7 promoter/lac operator, which is induced by using isopropyl 1-thio- $\beta$ -D-galactopyranoside (IPTG). This plasmid confers kanamycin resistance, and contains an RSF replication origin and the *LacI* gene, which codes for Lac repressor.

### Sequential over-expression of $^{15}\text{N}$ -Pup and Mpa

Plasmids pASK-Pup and pRSF-*Msm* Mpa were co-transformed into *E. coli* strain BL21(DE3) Codon+ (Novagen) for sequential over-expression of [ $U$ - $^{15}\text{N}$ ] Pup-GGQ and Mpa, respectively. [ $U$ - $^{15}\text{N}$ ] Pup-GGQ was overexpressed for 2 hours followed by over-expression of unlabeled Mpa. [ $U$ - $^{15}\text{N}$ ] labeling was achieved by growing cells in minimal medium (M9 salts containing calcium chloride (10  $\mu\text{M}$ ), glucose (0.4%), magnesium sulfate (2 mM), and thiamine hydrochloride (1 mM)) containing ampicillin (100 mg/L), kanamycin (35 mg/L), and [ $U$ - $^{15}\text{N}$ ] ammonium chloride (1 g/L) as the sole nitrogen source. Pup-GGQ over-expression was induced with anhydrotetracycline (0.2  $\mu\text{g}/\text{mL}$ ) in dimethylformamide (DMF) when the culture reached an  $\text{OD}_{595}$  of 0.7, and the cells grown with shaking for 2 hours at 37 °C. Cells (100 mL) expressing labeled Pup were collected and washed twice with the NMR buffer (50 mL) (potassium phosphate buffer (10 mM, pH 6.5)) prior to NMR analysis. Cells expressing Pup were centrifuged, and washed twice with 1xM9 salts and re-suspended to a final  $\text{OD}_{595}$  of 0.7 in fresh unlabeled Luria Broth containing ampicillin (100 mg/L) and kanamycin (35 mg/L). Expression of Mpa was induced with IPTG (0.5 mM) and the cells grown with shaking at 37 °C. Samples (100 mL) of 2 hour [ $U$ - $^{15}\text{N}$ ] Pup and unlabeled Mpa were collected at 3, 4, 6, 7, 8, and 18 hours post IPTG induction, for a total of six samples. Each sample was washed twice with NMR buffer

(50 mL) before being re-suspended in the NMR buffer (450 uL) and D<sub>2</sub>O (50 uL) for a total volume of 500 uL.

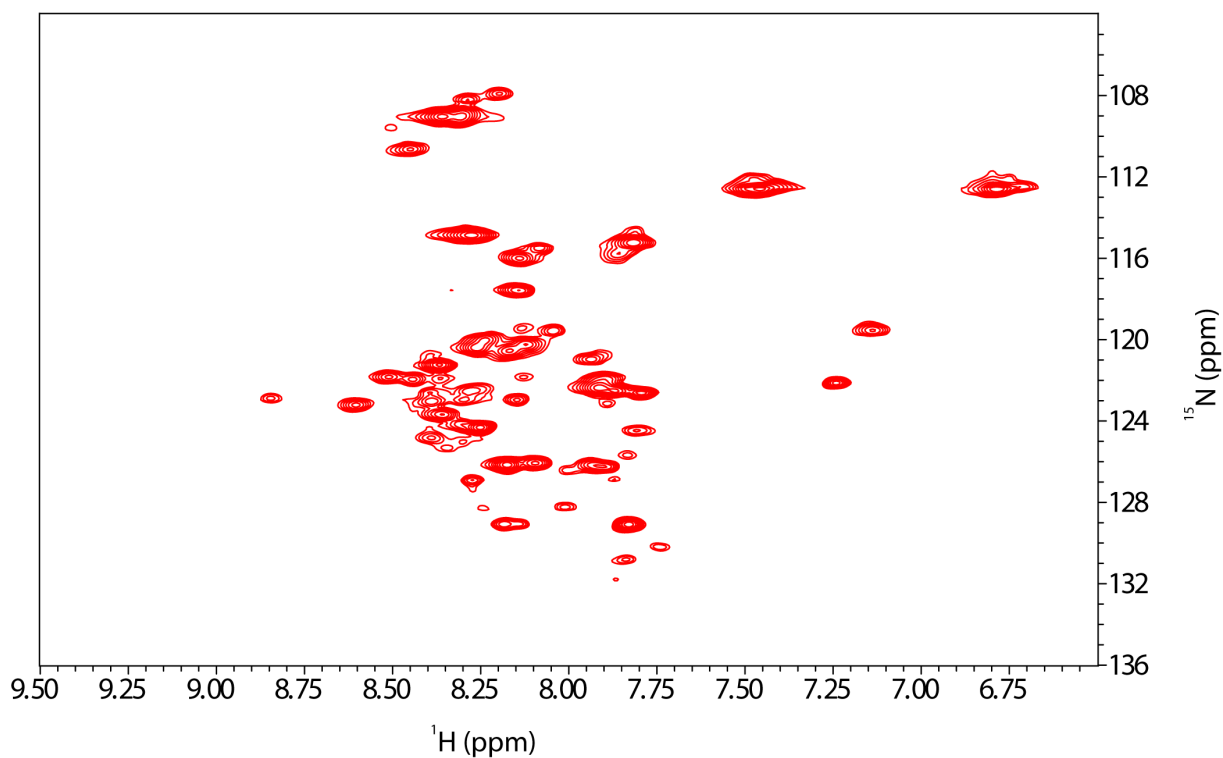

**Figure S1. In-cell NMR spectra of free [ $U$ - $^{15}\text{N}$ ] Pup.** To express [ $U$ - $^{15}\text{N}$ ] Pup, cells grown on [ $U$ - $^{15}\text{N}$ ] minimal medium were induced by anhydrotetracycline (0.2  $\mu\text{g}/\text{mL}$ ) for 2 hours. The cells were pelleted, washed twice with the NMR buffer (50 mL) (potassium phosphate buffer (10 mM pH 6.5), re-suspended in the NMR buffer (450  $\mu\text{L}$ ) and  $\text{D}_2\text{O}$  (50  $\mu\text{L}$ ), and transferred to a standard 5 mm NMR tube for in-cell NMR analysis.

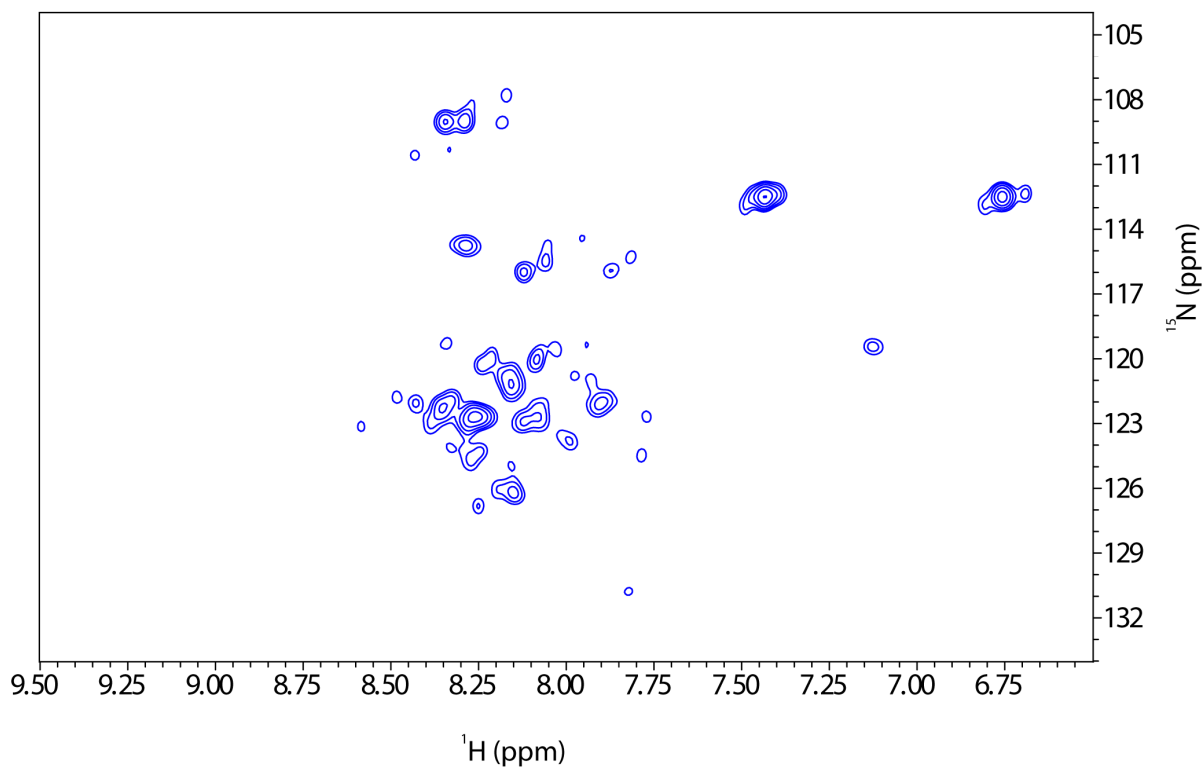

**Figure S2. In-cell NMR spectrum of  $[U\text{-}^{15}\text{N}]$  Pup/MPA complex.** To create a  $[U\text{-}^{15}\text{N}]$  Pup-MPA complex, after 2 hours of  $[U\text{-}^{15}\text{N}]$  Pup expression, the cells were re-suspended in unlabeled rich medium and expression of Mpa was induced by IPTG (0.5 mM) for 8 hours. The cells were pelleted, washed twice with the NMR buffer (50 mL) (potassium phosphate buffer (10 mM, pH 6.5), re-suspended in the NMR buffer (450  $\mu\text{L}$ ) and  $\text{D}_2\text{O}$  (50  $\mu\text{L}$ ), and transferred to a standard 5 mm NMR tube for in-cell NMR analysis.

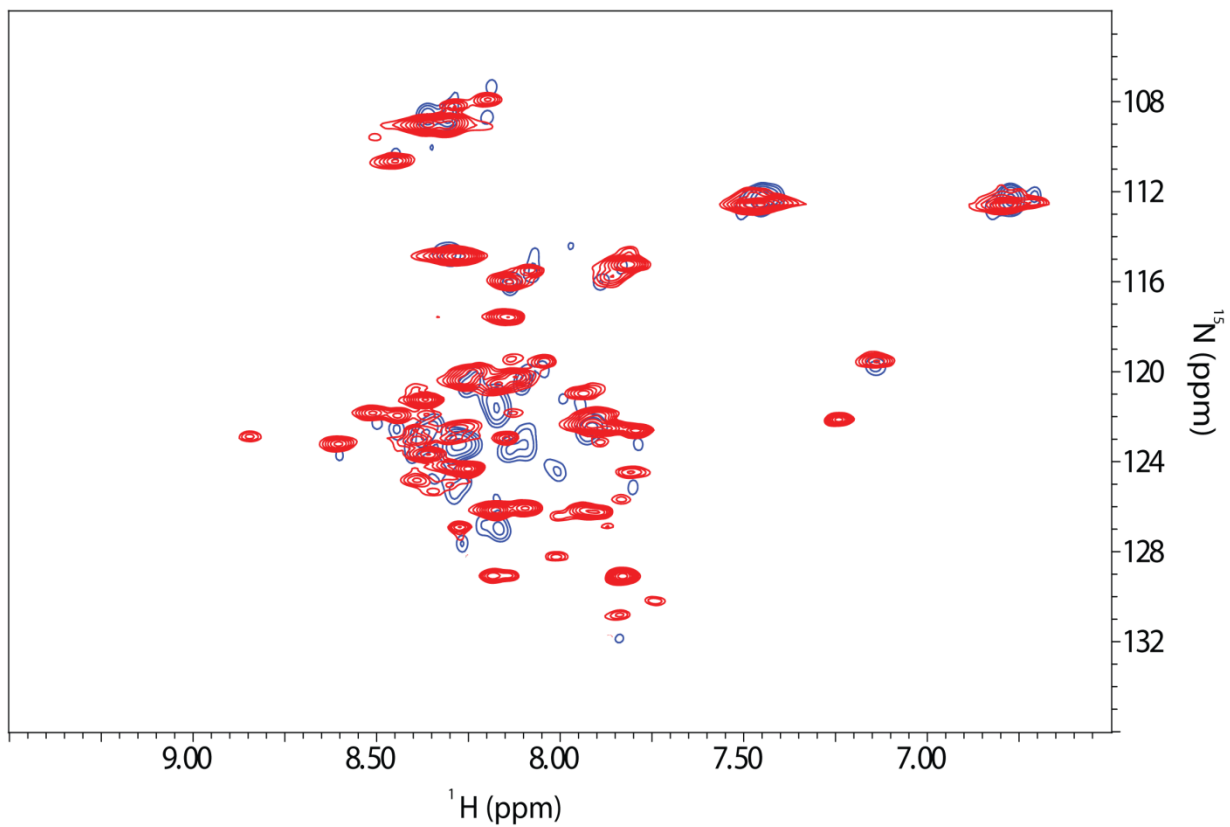

**Figure S3. Overlay of in-cell NMR spectra of free  $[U\text{-}^{15}\text{N}]$  Pup (red) and  $[U\text{-}^{15}\text{N}]$  Pup/MPA complex (blue).** The peaks from  $[U\text{-}^{15}\text{N}]$  Pup/Mpa (blue) show differential broadening compared to those of free  $[U\text{-}^{15}\text{N}]$  Pup (red).

**Table S1. Matrix M: The scaled intensities of Pup residues at various Mpa overexpression times.**

| Residue # | 4hrs         | 5hrs         | 6hrs         | 7hrs         | 8hrs         | 18hrs        |
|-----------|--------------|--------------|--------------|--------------|--------------|--------------|
| 1         | -0.010965029 | 0.010313901  | 0.05014533   | 0.030400033  | 0.053721231  | 0.043644329  |
| 2         | -0.101844623 | -0.073658032 | -0.068699048 | -0.114617417 | -0.129514046 | -0.023239254 |
| 3         | -0.088215607 | -0.097832379 | -0.095817042 | -0.117872947 | -0.120500654 | -0.139916005 |
| 4         | -0.061208758 | -0.081909166 | -0.114555562 | -0.109437602 | -0.125766277 | -0.118433731 |
| 5         | -0.05584564  | -0.0602612   | -0.059676737 | -0.052876714 | -0.058851648 | -0.080175547 |
| 6         | -0.023119292 | -0.005230688 | -0.009643726 | -0.019411061 | -0.039227698 | 0.027929839  |
| 7         | -0.013348223 | -0.015254886 | -0.01950945  | -0.03907527  | -0.020968107 | -0.006006758 |
| 8         | -0.087926456 | -0.098471411 | -0.106579928 | -0.111450342 | -0.119753789 | -0.123771822 |
| 9         | 0.037481674  | -0.154653768 | -0.006434824 | -0.118009262 | -0.209619901 | -0.268895791 |
| 10        | -0.076187975 | -0.297463119 | -0.284514133 | -0.324464929 | -0.360284099 | -0.445371241 |
| 12        | 0.034213985  | -0.112638992 | 0.014260747  | -0.090819001 | -0.196055926 | -0.344998597 |
| 13        | -0.069564842 | -0.077139328 | -0.090821184 | -0.123154568 | -0.150791969 | -0.254764384 |
| 14        | -0.086163207 | -0.034394642 | -0.033490074 | -0.041572067 | -0.27003462  | -0.056771368 |
| 15        | -0.064039731 | -0.052575495 | -0.083982479 | -0.108248167 | -0.099748078 | -0.141057264 |
| 16        | -0.020924794 | -0.002145708 | -0.062650448 | -0.059107833 | -0.073565602 | -0.147671848 |
| 17        | -0.003679727 | 0.037174421  | -0.004282472 | 0.004491546  | 0.016498266  | -0.035176394 |
| 18        | 0.01678094   | 0.067108806  | 0.025535855  | 0.025108097  | 0.036740344  | 0.042889379  |
| 19        | -0.000612785 | 0.011050543  | 0.012895079  | 0.00902768   | 0.027991635  | 0.006208893  |
| 20        | 0.017031967  | 0.043460141  | 0.047320802  | 0.016587759  | 0.03481761   | 0.043898772  |
| 21        | 0.002625693  | -0.018743765 | -0.036589821 | -0.034268579 | -0.037146356 | -0.046006109 |
| 23        | -0.034249208 | 0.061019118  | 0.058370806  | 0.014069673  | 0.024263299  | 0.134723565  |

---

|    |              |              |              |              |              |              |
|----|--------------|--------------|--------------|--------------|--------------|--------------|
| 24 | -0.013320864 | 0.033482834  | 0.016325117  | 0.012148153  | -0.009187312 | -0.027626495 |
| 25 | 0.030207864  | 0.062240678  | 0.067065746  | 0.055694413  | 0.056129566  | 0.033129428  |
| 26 | 0.04643248   | 0.095636564  | 0.07371004   | 0.055039754  | 0.064298318  | 0.040019059  |
| 27 | 0.254387347  | 0.330749696  | 0.270428554  | 0.248816774  | 0.297254513  | 0.384107287  |
| 28 | 0.183844606  | 0.393155328  | 0.28992729   | 0.206924862  | 0.378217179  | 0.452292746  |
| 29 | 0.250326814  | 0.353514991  | 0.267682578  | 0.335310206  | 0.351450488  | 0.355590821  |
| 30 | 0.315911612  | 0.385362     | 0.378349972  | 0.37166985   | 0.385785617  | 0.26452242   |
| 31 | 0.050429577  | 0.064069617  | 0.049186868  | 0.049425893  | 0.051344634  | 0.056915562  |
| 32 | 0.096068121  | 0.162137085  | 0.124323744  | 0.130228768  | 0.167316536  | 0.15099894   |
| 33 | 0.281616396  | 0.377072795  | 0.320801323  | 0.357364048  | 0.382023121  | 0.456292203  |
| 34 | 0.225761503  | 0.299756387  | 0.280741964  | 0.272661951  | 0.302996502  | 0.243618048  |
| 35 | 0.114855434  | 0.169452878  | 0.137313955  | 0.155092692  | 0.154963114  | 0.165130575  |
| 36 | 0.251413119  | 0.385436722  | 0.31267037   | 0.305460059  | 0.371461557  | 0.591495041  |
| 37 | 0.039722946  | -0.003326031 | -0.061561975 | -0.065943578 | -0.08417341  | -0.182497105 |
| 38 | 0.12151381   | 0.229565521  | 0.165855046  | 0.178153123  | 0.196768858  | 0.194222212  |
| 39 | 0.111706432  | 0.1549332    | 0.15613129   | 0.150812273  | 0.163424016  | 0.349207552  |
| 40 | 0.240443836  | 0.338631355  | 0.254884563  | 0.275342316  | 0.172710852  | 0.443912627  |
| 41 | 0.221503574  | 0.353357273  | 0.290400331  | 0.219296824  | 0.183256631  | 0.450198822  |
| 42 | 0.055648653  | 0.155645828  | 0.117820286  | 0.068685495  | 0.137689785  | 0.159178061  |
| 43 | 0.079773928  | 0.122681605  | 0.100091489  | 0.124897617  | 0.112623788  | 0.232539609  |
| 44 | 0.258632205  | 0.338708577  | 0.314750579  | 0.304302368  | 0.305675778  | 0.491296543  |
| 45 | 0.122474439  | 0.122645199  | 0.112507292  | 0.136002307  | 0.133507253  | 0.16464605   |
| 48 | 0.251413119  | 0.385436722  | 0.30749087   | 0.305460059  | 0.371461557  | 0.591495041  |
| 49 | 0.162223235  | 0.239383476  | 0.270440538  | 0.289817578  | 0.364937707  | 0.316557015  |
| 50 | 0.107412702  | 0.141396898  | 0.116331284  | 0.132767302  | 0.151523951  | 0.142855654  |

---

---

|    |             |             |             |             |              |             |
|----|-------------|-------------|-------------|-------------|--------------|-------------|
| 51 | 0.106786478 | 0.153229692 | 0.147713751 | 0.154025549 | 0.180643628  | 0.182318319 |
| 52 | 0.114293195 | 0.163180652 | 0.153726403 | 0.149546689 | 0.18450093   | 0.212450971 |
| 53 | 0.032645503 | 0.074141039 | 0.074598121 | 0.058132777 | -0.194103599 | 0.060563089 |
| 54 | 0.100496678 | 0.163085371 | 0.173661892 | 0.172758732 | 0.175007567  | 0.158934458 |
| 55 | 0.061367159 | 0.125719401 | 0.144694477 | 0.10704934  | 0.127837377  | 0.132733028 |
| 56 | 0.092525222 | 0.140857153 | 0.146647521 | 0.11605136  | 0.138239306  | 0.165190331 |
| 57 | 0.120085628 | 0.15914927  | 0.166323256 | 0.138599794 | 0.159274304  | 0.237909577 |
| 58 | 0.094820971 | 0.160982624 | 0.179115416 | 0.170479009 | 0.166126956  | 0.17598945  |
| 61 | -0.01853032 | 0.098335151 | 0.003593863 | 0.06200133  | -0.050495376 | 0.015057095 |
| 62 | 0.084016309 | 0.119491389 | 0.103486522 | 0.125519611 | 0.122909349  | 0.161962608 |
| 63 | 0.104529752 | 0.113936441 | 0.157944788 | 0.137532487 | 0.138428586  | 0.168061545 |
| 64 | 0.02906323  | 0.072392326 | 0.053649134 | 0.056050823 | 0.062852162  | 0.086581325 |

---



**Table S2. Matrix V and Singular Values of M.**

| Dataset | 4hrs    | 5hrs    | 6hrs    | 7hrs    | 8hrs    | 18hrs   | Singular Values |
|---------|---------|---------|---------|---------|---------|---------|-----------------|
| Index   |         |         |         |         |         |         |                 |
| 1       | 0.2757  | 0.4233  | 0.3672  | 0.3723  | 0.4221  | 0.5415  | 3.3759          |
| 2       | -0.4458 | -0.1446 | -0.3176 | -0.2165 | -0.1077 | 0.7881  | 0.5221          |
| 3       | 0.2436  | 0.2808  | 0.2338  | 0.0234  | -0.8820 | 0.1694  | 0.4272          |
| 4       | -0.7075 | 0.6304  | -0.0133 | 0.2094  | -0.0383 | -0.2377 | 0.2199          |
| 5       | 0.3350  | 0.5683  | -0.4210 | -0.6058 | 0.1413  | -0.0229 | 0.2144          |
| 6       | -0.2304 | -0.0265 | 0.7295  | -0.6349 | 0.1042  | -0.0014 | 0.1645          |

**References**

1. Maldonado AY, Burz DS, Reverdatto S, Shekhtman A (2013) Fate of Pup inside the Mycobacterium proteasome studied by in-cell NMR. PLoS One 8: e74576.
2. Piotto M, Saudek V, Sklenar V (1992) Gradient-tailored excitation for single-quantum NMR spectroscopy of aqueous solutions. J Biomol NMR 2: 661-665.
3. Chen X, Solomon WC, Kang Y, Cerda-Maira F, Darwin KH, et al. (2009) Prokaryotic ubiquitin-like protein pup is intrinsically disordered. J Mol Biol 392: 208-217.
4. Farmer BT, 2nd, Constantine KL, Goldfarb V, Friedrichs MS, Wittekind M, et al. (1996) Localizing the NADP+ binding site on the MurB enzyme by NMR. Nat Struct Biol 3: 995-997.
5. Golub GH, Van Loan CF (2012) Matrix Computations. Baltimore, USA: The Johns Hopkins University Press.
